# Supplementary material for: Fabrication of a novel polypyrrole/poly(methyl methacrylate) coaxial nanocable using mesoporous silica as a nanoreactor
Source: Royal Society of Chemistry journal article supplement (doi:10.1039/b006197m), 2001-01-01
Supplement: b006197m.doc [file b006197m.doc]

**Electronic Supplementary Information for:**

**Fabrication of a Novel Polypyrrole/Poly(methyl methacrylate) Coaxial Nanocable using Mesoporous Silica as a Nanoreactor**

*Jyongsik Jang,* Byungkwon Lim, Jinwoo Lee and Taeghwan Hyeon*

*School of Chemical Engineering, Seoul National University, Seoul 151-742, Korea.*

1. The FT-IR spectra of SBA-15, PMMA/SBA-15, and PPy/PMMA/SBA-15 nanocomposites. The spectra were obtained with a Bomem MB-100 instrument.


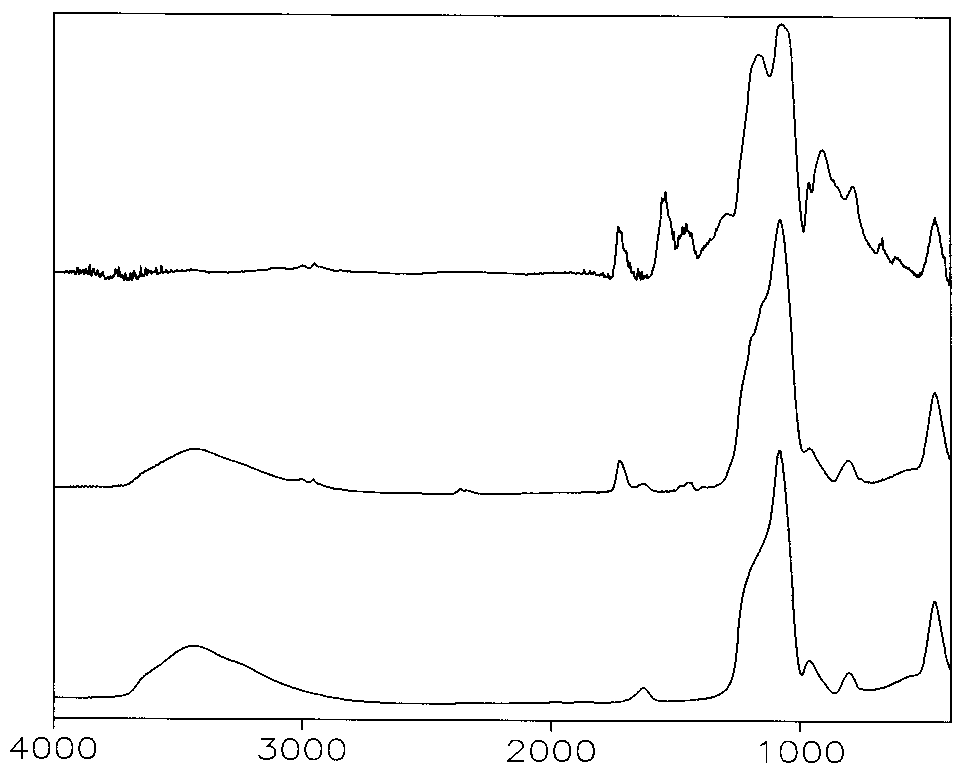


Absorbance

Wavenumber (cm-1)

(A)

(B)

(C)

The characteristic peaks of PMMA

The characteristic peaks of PPy

2. Small-angle X-ray diffraction (XRD) patterns of SBA-15 silica (trace A), PMMA/SBA-15 nanocomposite (trace B), and PPy/PMMA/SBA-15 nanocomposite (trace C). The patterns were acquired on a Bruker GADDS small-angle X-ray scattering with general area detector diffracting system.

#### 3. TEM images of SBA-15 (A) and PMMA/SBA-15 (B).


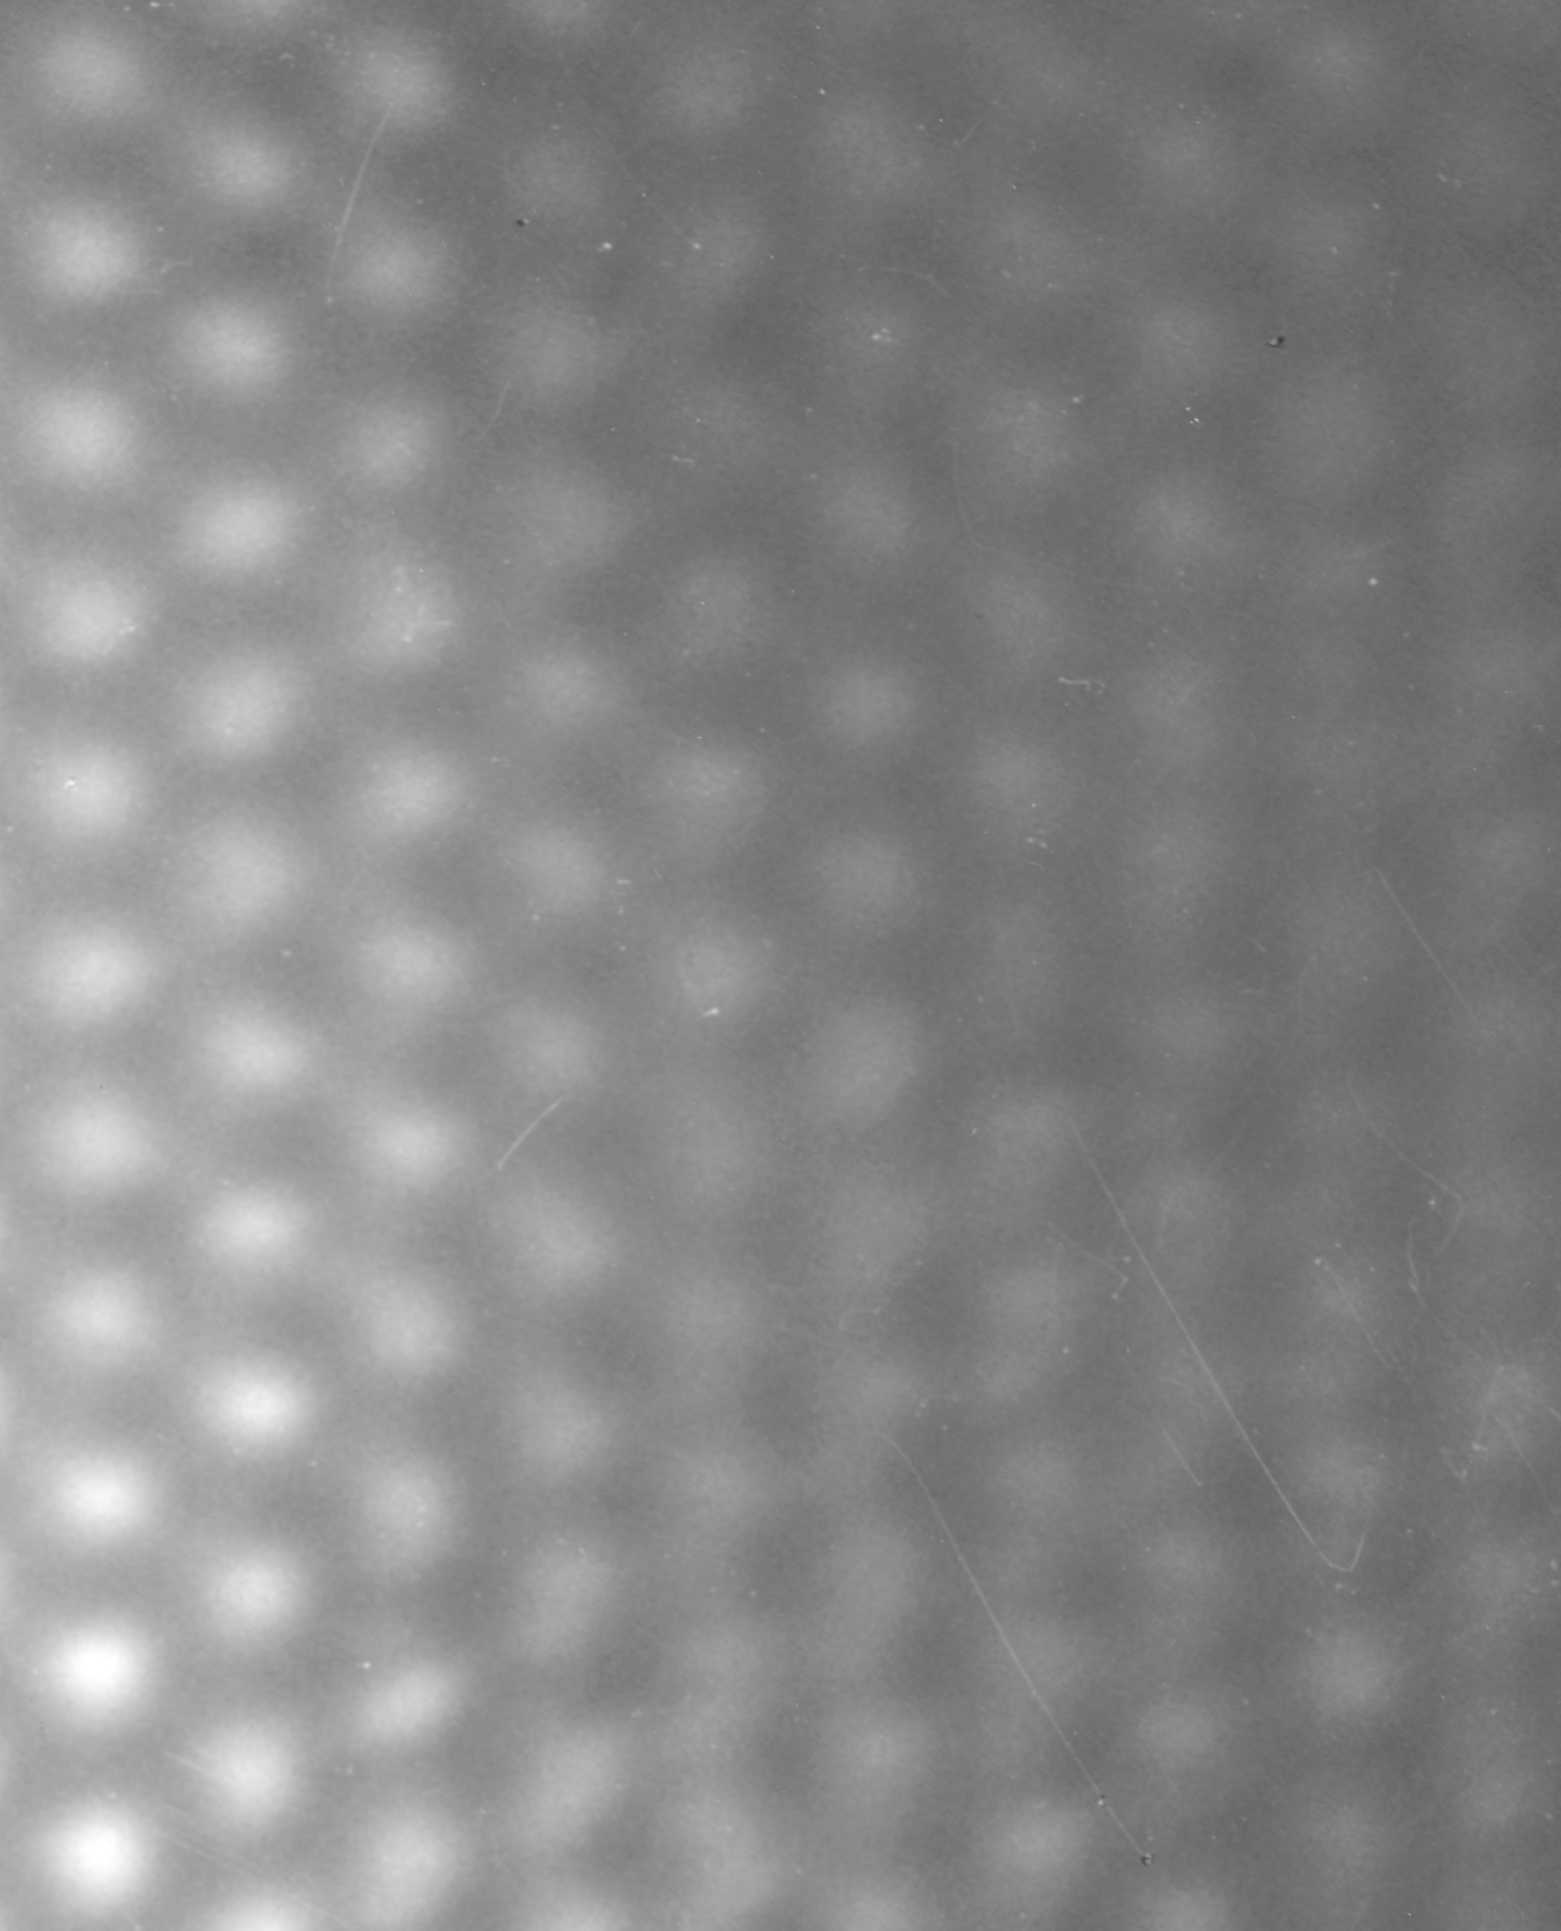


20 nm


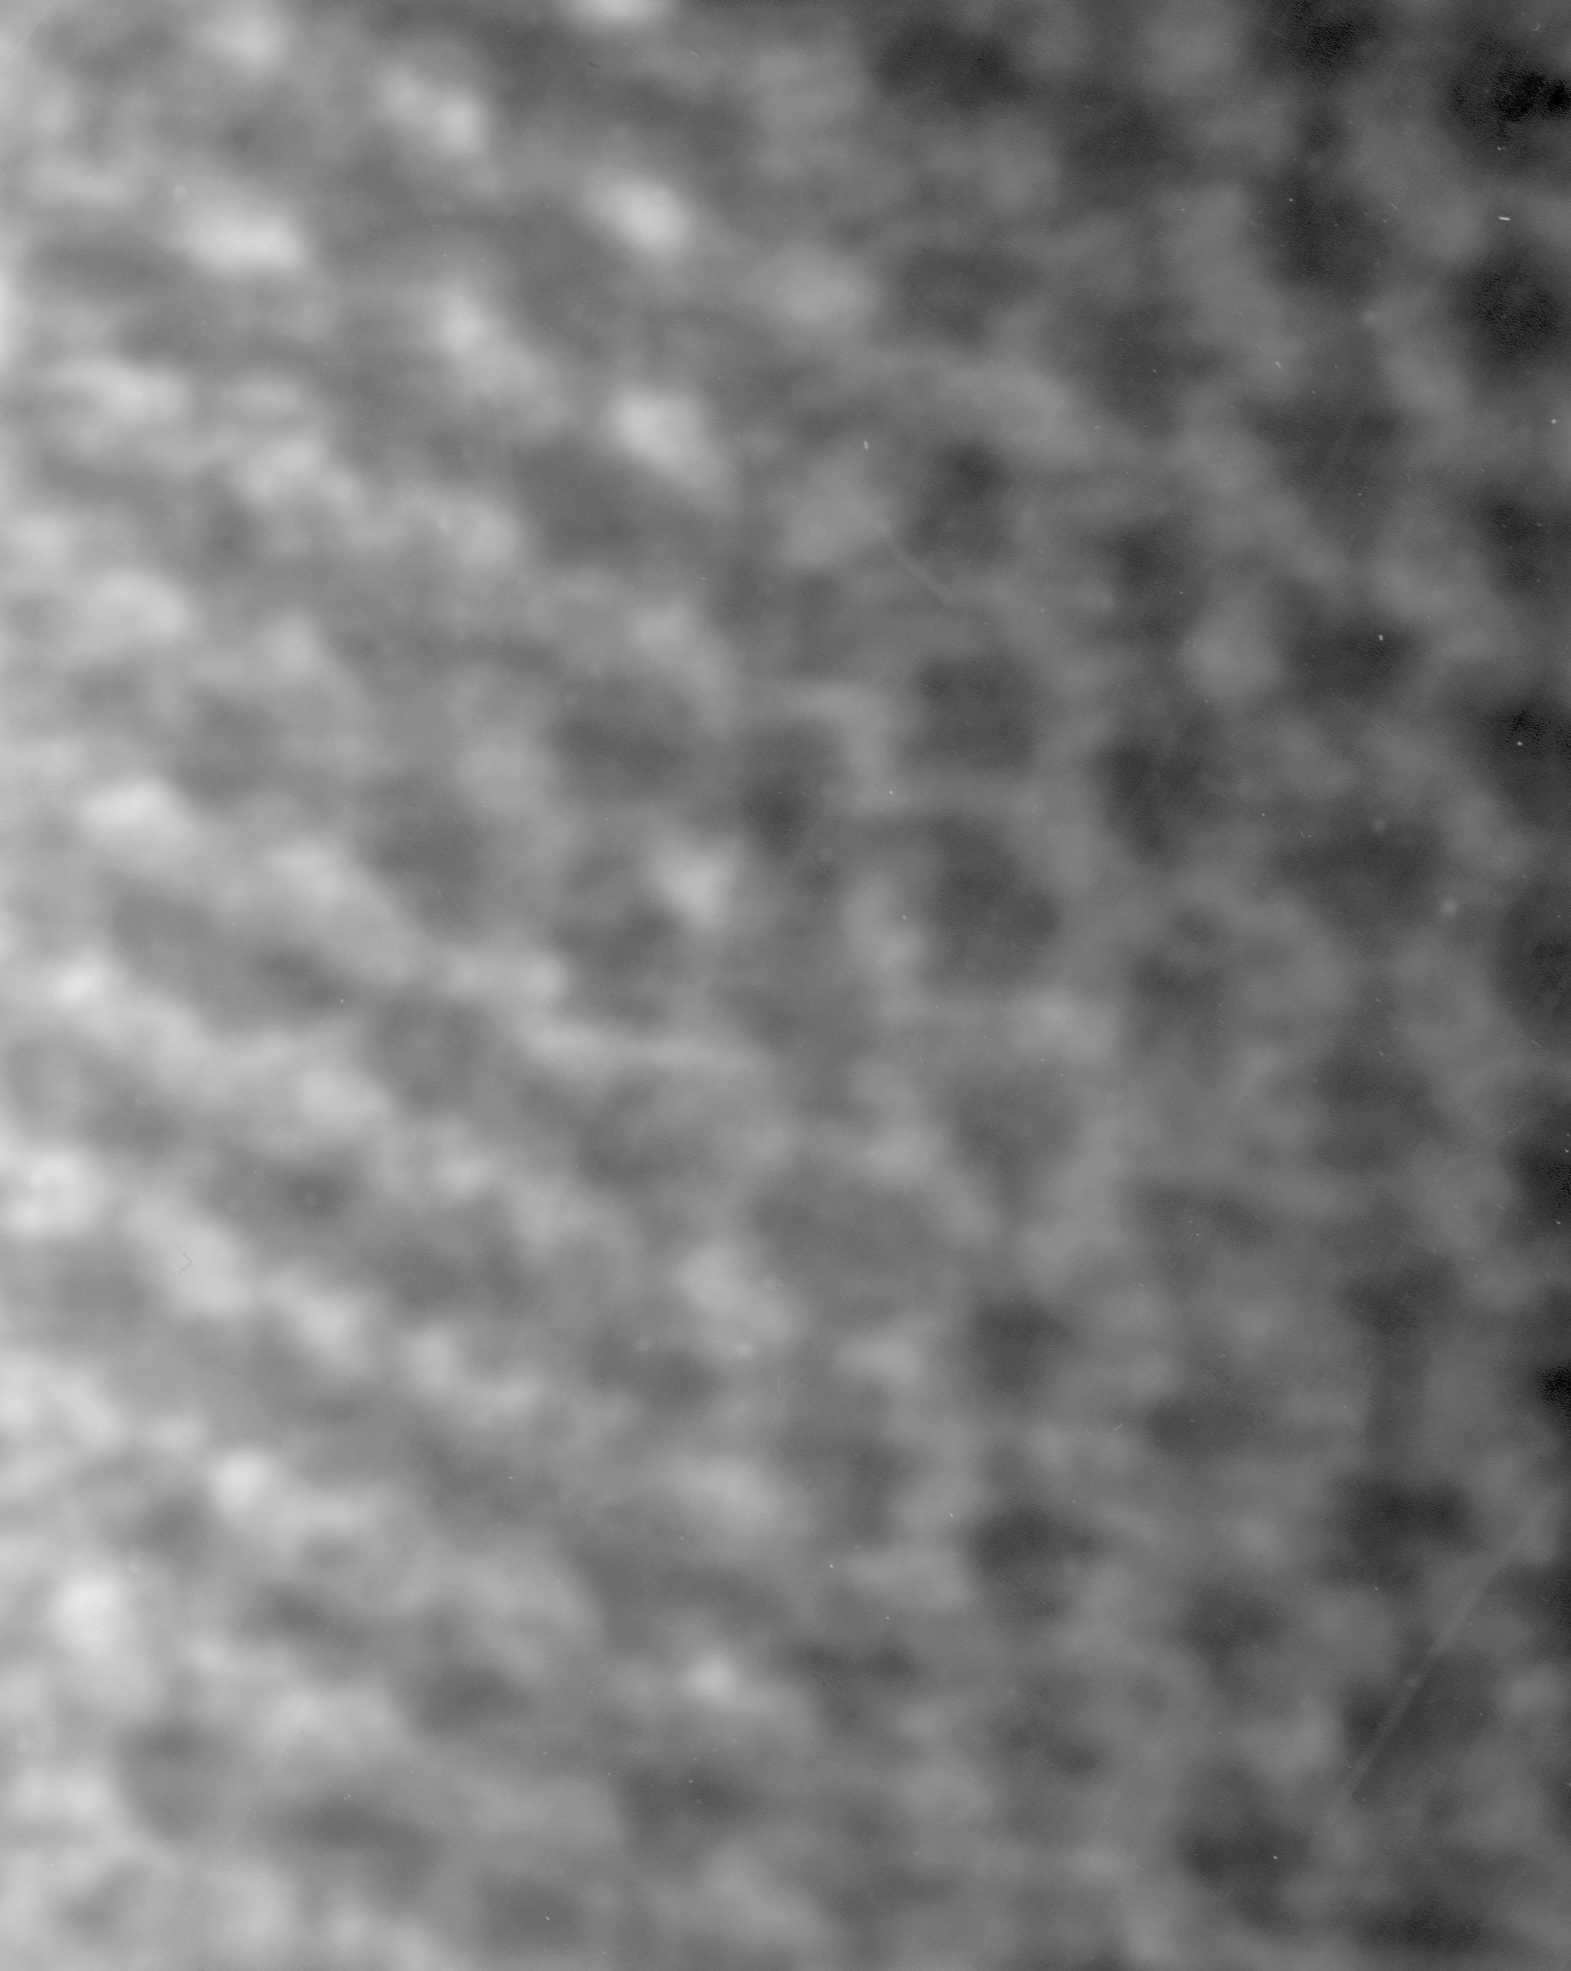


20 nm

(A)

(B)
